# Supplementary material for: Electrocatalytic activity sites for the oxygen evolution reaction on binary cobalt and nickel phosphides
Source: Royal Society of Chemistry journal article supplement (doi:10.1039/d0ra07284b), 2020-01-01
Supplement: d0ra07284b1.pdf [file d0ra07284b1.pdf]

## Supporting Information

### **Electrocatalytic activity sites for the oxygen evolution reaction on binary cobalt and nickel phosphides**

Lin-Nan Zhou,<sup>a</sup> Lan Yu,<sup>a</sup> Cai Liu <sup>\*b</sup> and Yong-Jun Li <sup>\*a</sup>

<sup>a</sup> State Key Lab of Chemo/Biosensing and Chemometrics, College of Chemistry and Chemical Engineering, Hunan University, Changsha 410082, China. E-mail: [liyje@hnu.edu.cn](mailto:liyje@hnu.edu.cn)

<sup>b</sup> College of Chemical Engineering, Beijing Institute of Petrochemical Technology, Beijing 102617, China. E-mail: [liucan@bipt.edu.cn](mailto:liucan@bipt.edu.cn)

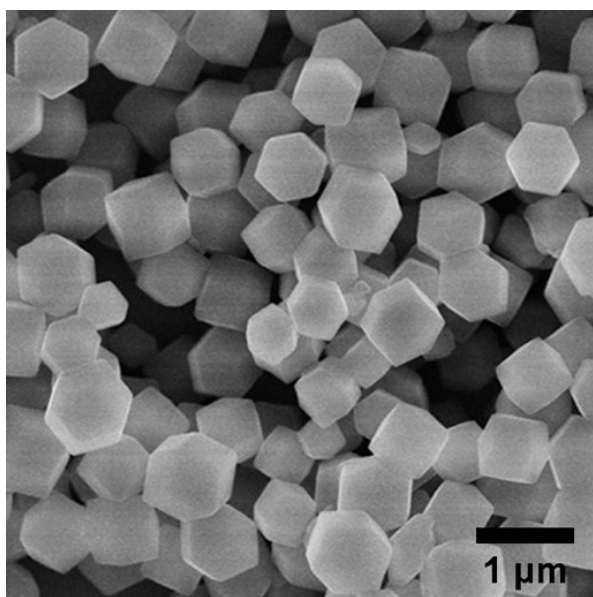

**Fig. S1** SEM image of ZIF-67 crystals.

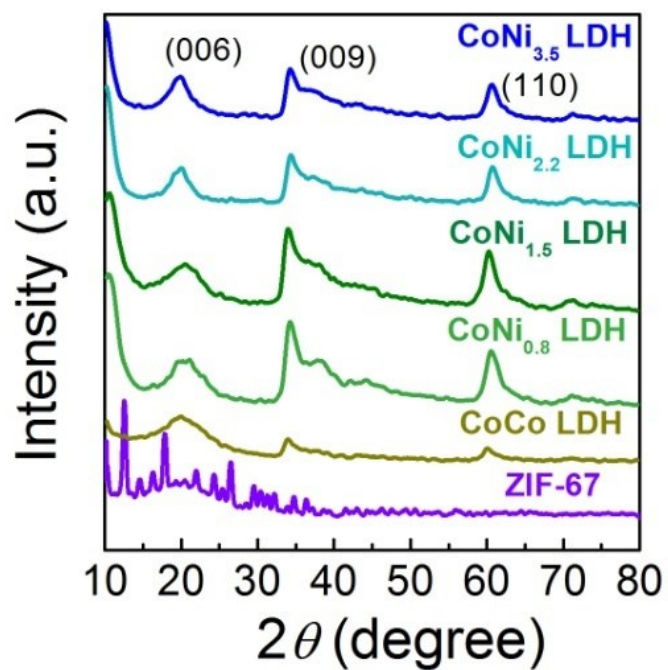

**Fig. S2** XRD patterns of ZIF-67, CoCo-, CoNi<sub>0.8</sub>-, CoNi<sub>1.5</sub>-, CoNi<sub>2.2</sub>-, and CoNi<sub>3.5</sub>-LDHs.

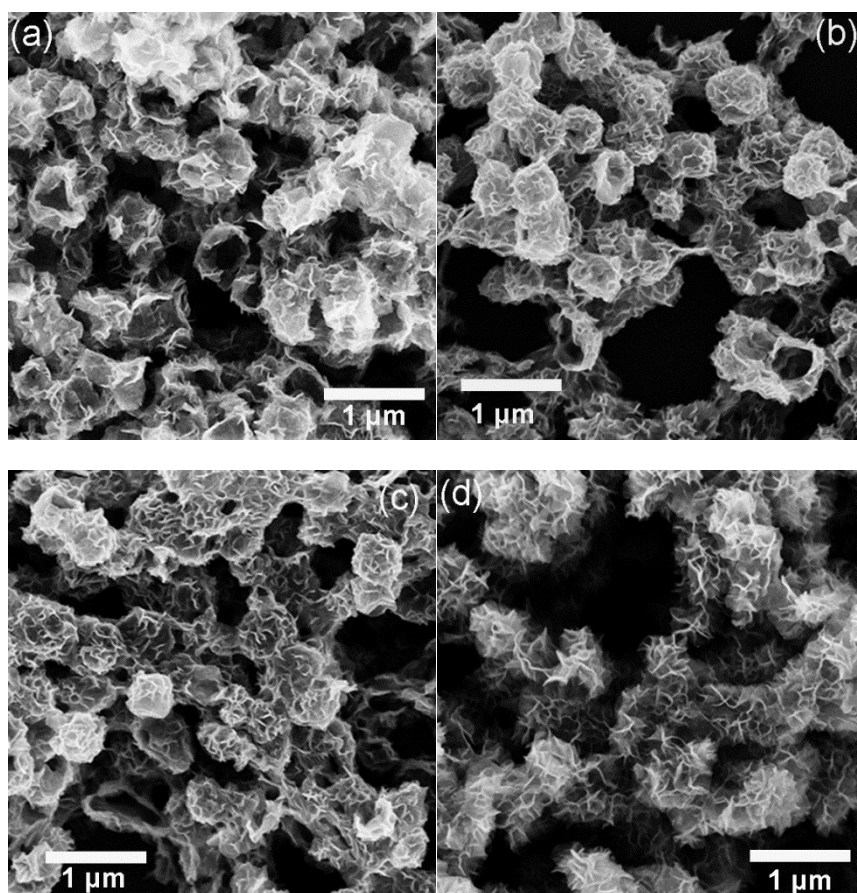

**Fig. S3** SEM images (a–d) of  $\text{CoNi}_{0.8}\text{P}$  (a),  $\text{CoNi}_{1.5}\text{P}$  (b),  $\text{CoNi}_{2.2}\text{P}$  (c) and  $\text{CoNi}_{3.5}\text{P}$  (d).

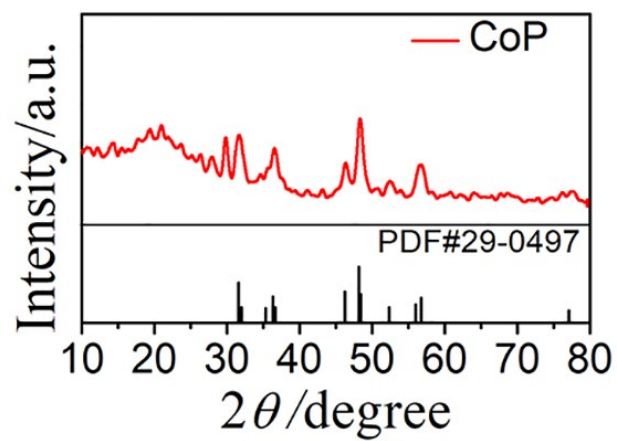

**Fig. S4** XRD pattern of CoP.

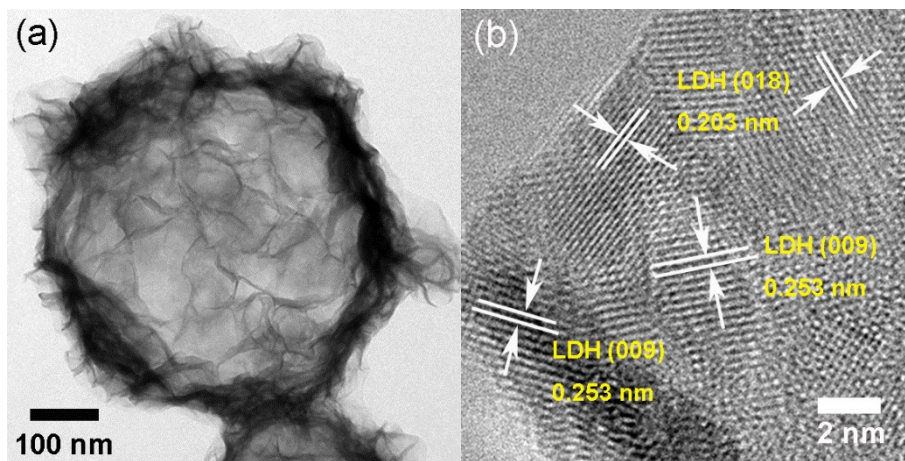

**Fig. S5** TEM images of CoNi<sub>1.5</sub>-LDH.

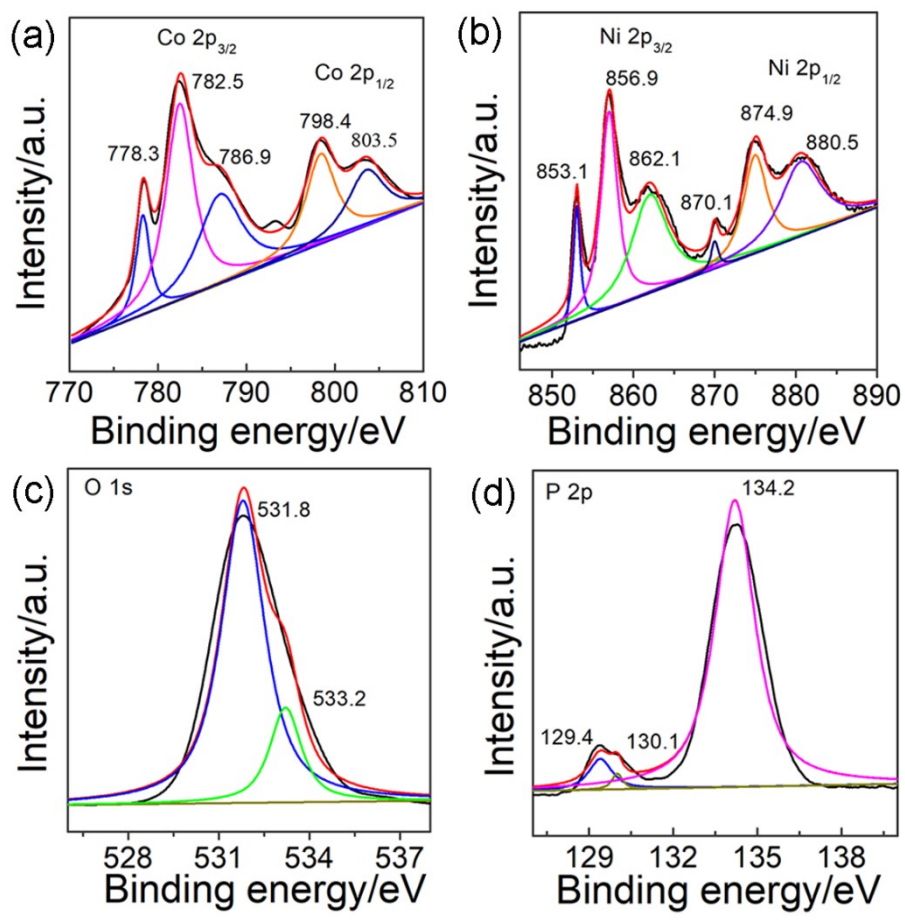

**Fig. S6** Co 2p (a), Ni 2p (b), P 2p (c) and O 1s (d) XPS spectra of  $\text{CoNi}_{1.5}\text{P}$ .

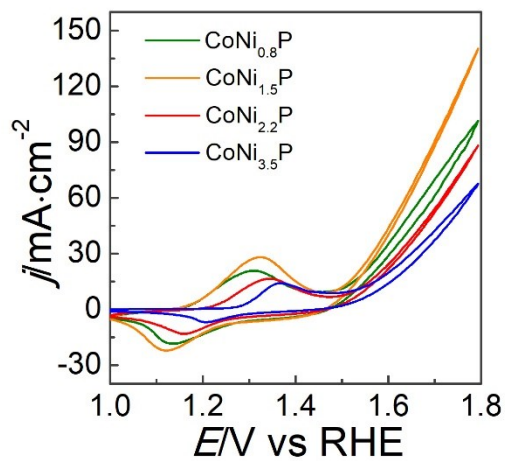

**Fig. S7** CV curves of CoNi<sub>0.8</sub>P, CoNi<sub>1.5</sub>P, CoNi<sub>2.2</sub>P and CoNi<sub>3.5</sub>P in O<sub>2</sub>-saturated 1.0 mol·L<sup>-1</sup> KOH aqueous solution at a scan rate of 50 mV s<sup>-1</sup>.



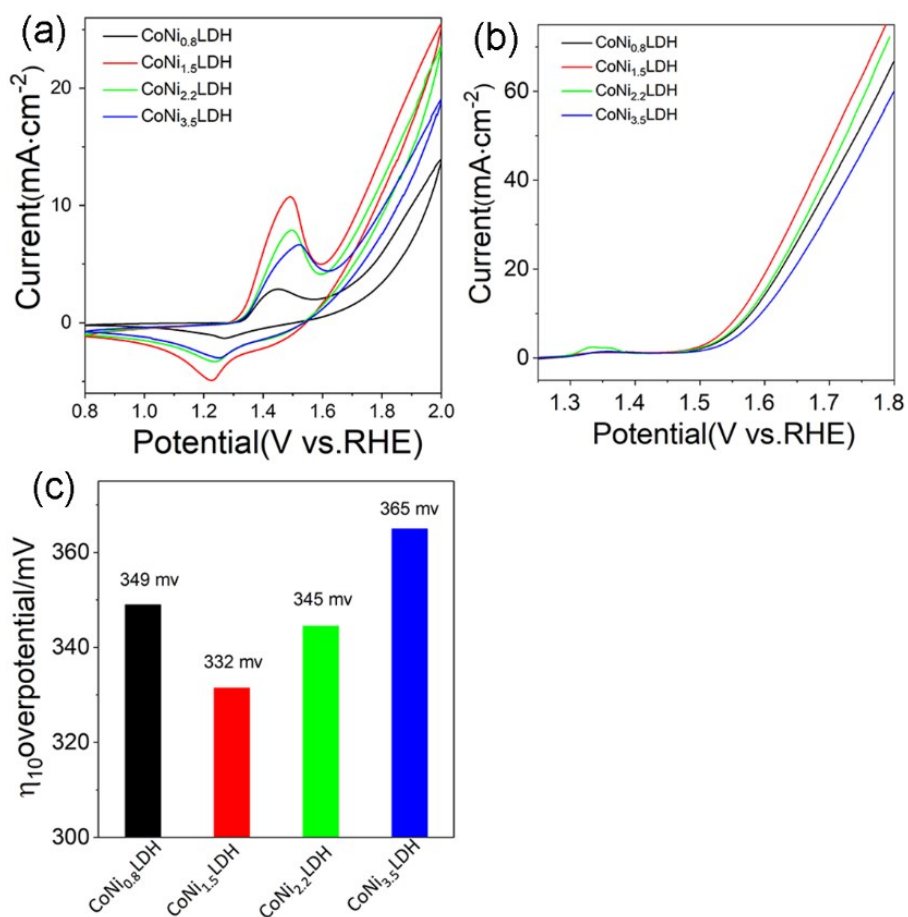

**Fig. S8** CV and LSV curves of CoNi<sub>0.8</sub>-LDH, CoNi<sub>1.5</sub>-LDH, CoNi<sub>2.2</sub>-LDH and CoNi<sub>3.5</sub>-LDH in O<sub>2</sub>-saturated 1.0 mol·L<sup>-1</sup> KOH aqueous solution at a scan rate of 50 mV s<sup>-1</sup>.

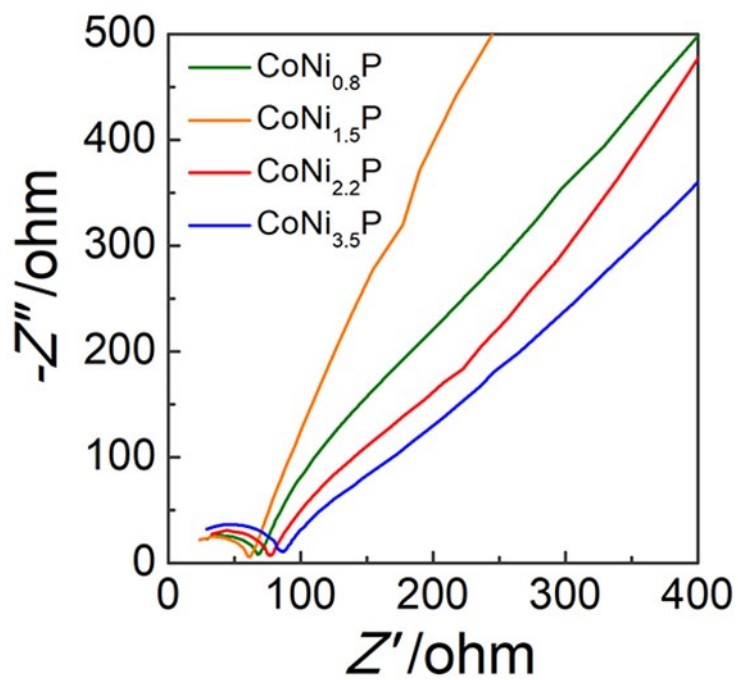

**Fig. S9** Nyquist diagram of CoNi<sub>0.8</sub>P, CoNi<sub>1.5</sub>P, CoNi<sub>2.2</sub>P and CoNi<sub>3.5</sub>P at open potentials in 1.0 mol·L<sup>-1</sup> KOH.

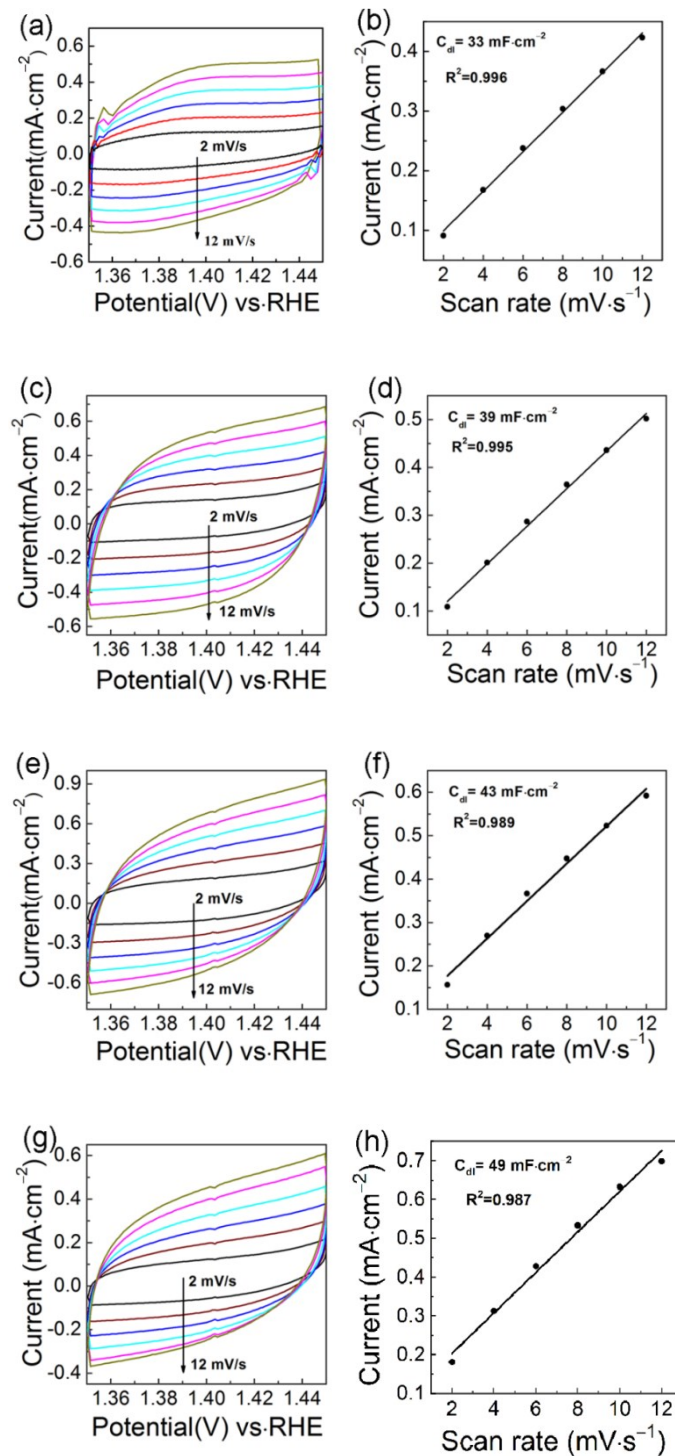

**Fig. S10** Cyclic voltammogram (CV) curves and current density as a function of scan rate derived from CV curves of CoNi<sub>0.8</sub>P (a-b), CoNi<sub>1.5</sub>P (c-d), CoNi<sub>2.2</sub>P and CoNi<sub>3.5</sub>P (e-f) at scan rates of 2, 4, 6, 8, 10 and 12 mV·s<sup>-1</sup> in 1.0 mol·L<sup>-1</sup> KOH.

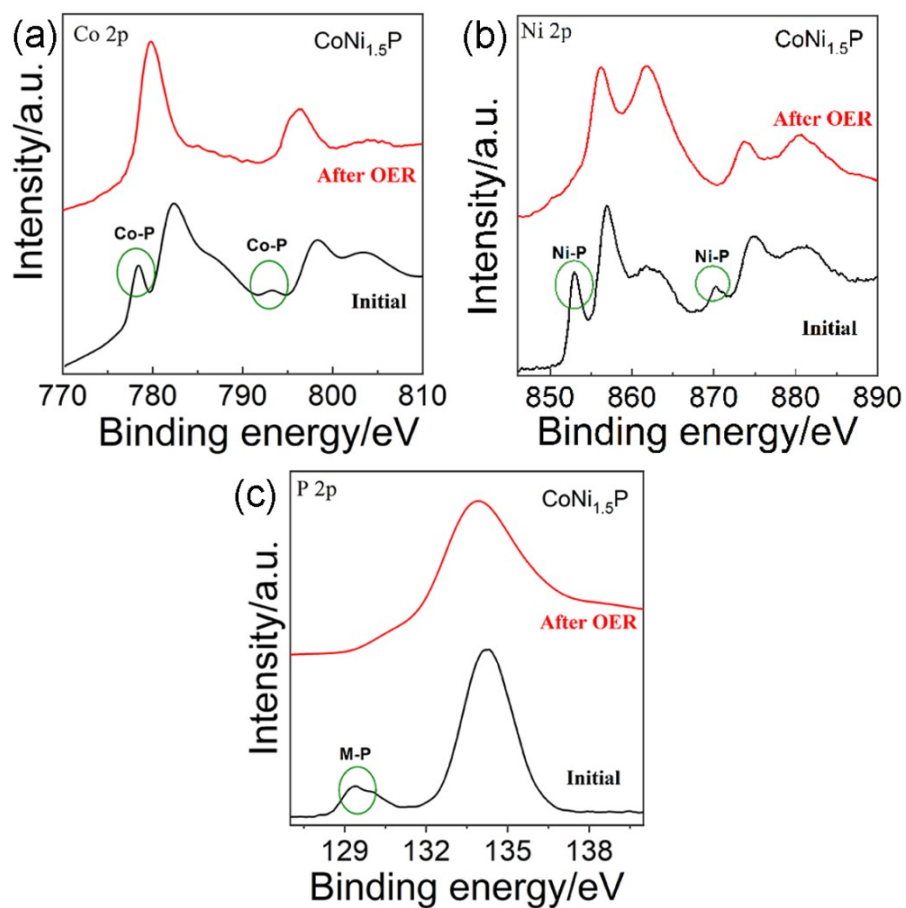

**Fig. S11** Co 2p (a), Ni 2p (b) and P 2p (c) XPS spectra of CoNi<sub>1.5</sub>P after 10 h OER test in O<sub>2</sub>-saturated 1.0 mol·L<sup>-1</sup> KOH aqueous solution.

**Table S1.** Comparison of OER activity of various reported catalysts in 1.0 mol·L<sup>-1</sup> KOH aqueous solution.

| <b>Catalyst</b>                                         | <b><math>\eta_{10}</math> /mV</b> | <b>Reference</b>                                        |
|---------------------------------------------------------|-----------------------------------|---------------------------------------------------------|
| <b>CoNi<sub>1.5</sub>P</b>                              | <b>278</b>                        | <b>This work</b>                                        |
| NiCoP/rGO                                               | 270                               | <i>10.1002/adfm.201601420</i>                           |
| Co-Mn-P                                                 | 330                               | <i>J. Am. Chem. Soc. 2016, 138, 4006</i>                |
| Co-P film                                               | 345                               | <i>Angew. Chem. Int. Ed. 2015, 54, 6251</i>             |
| Ni <sub>5</sub> P <sub>4</sub> films                    | 290                               | <i>Angew. Chem. 2015, 127, 12538</i>                    |
| Ni <sub>2</sub> P                                       | 290                               | <i>Energy Environ. Sci. 2015, 8, 2347</i>               |
| NiP/Ni                                                  | 270                               | <i>Adv. Funct. Mater. 2016, 26, 3314</i>                |
| Ni-P                                                    | 300                               | <i>Energy Environ. Sci. 2016, 9, 1246</i>               |
| CoP MNA                                                 | 290                               | <i>Adv. Funct. Mater. 2015, 25, 7337</i>                |
| Ni <sub>0.51</sub> Co <sub>0.49</sub> P                 | 239                               | <i>10.1002/adfm.201603727</i>                           |
| NiCoP                                                   | 310                               | <i>Adv. Mater. Interfaces 2016, 3, 1500454</i>          |
| (Co <sub>0.52</sub> Fe <sub>0.48</sub> ) <sub>2</sub> P | 270                               | <i>Energy Environ. Sci. 2016, 9, 2257</i>               |
| CoP/rGO-400                                             | 340                               | <i>Chem. Sci. 2016, 7, 1690</i>                         |
| NiCoP/CC                                                | 242                               | <i>ACS Catal. 2017, 7, 4131-4137</i>                    |
| NiCoP/CNF                                               | 268                               | <i>Adv. Energy Mater. 2018, 1800555</i>                 |
| NiFe LDH@NiCoP/NF                                       | 220                               | <i>Adv. Funct. Mater. 2018, 28, 1706847</i>             |
| Ni <sub>0.6</sub> Co <sub>1.4</sub> P                   | 300                               | <i>Adv. Funct. Mater. 2018, 1706008</i>                 |
| h-CoNiP/rGO                                             | 370                               | <i>Electrochemistry Communications 83 (2017) 85–89</i>  |
| NiCoP/NC PHCs                                           | 297                               | <i>J. Mater. Chem. A, 2017, 5, 18839–18844</i>          |
| NiCoP@Cu <sub>3</sub> P/CF                              | 309                               | <i>J. Mater. Chem. A, 2018, 6, 2100–2106</i>            |
| Ni <sub>2</sub> P-CoP                                   | 320                               | <i>ACS Appl. Mater. Interfaces 2017, 9, 23222-23229</i> |
| CoP/NCNHP                                               | 310                               | <i>J. Am. Chem. Soc. 2018, 140, 2610-2618</i>           |
